# Supplementary material
Source: PubMed Central journal article supplement (PMC5625065)
Supplement: 10.1074_M117.780528_jbc.M117.780528-1.pdf [file 10.1074_M117.780528_jbc.M117.780528-1.pdf]

## A pH Dependent Switch Promotes $\beta$ -Synuclein Fibril Formation via Glutamate Residues

Gina M. Moriarty, Michael P. Olson, Tamr B. Atieh, Maria K. Janowska, Sagar D. Khare\*, and Jean Baum\*

Department of Chemistry and Chemical Biology, Rutgers University, Piscataway, New Jersey 08854

Current address: MKJ: Department of Biochemistry, University of Washington, Seattle, WA

Running title: *Mildly Acidic pH Promotes Fibril Formation of  $\beta$ -Synuclein*

\*To whom correspondence may be addressed: Jean Baum, Dept. of Chemistry and Chemical Biology Rutgers University, 610 Taylor Rd, Piscataway, NJ 08854. Telephone: (848) 445-5284; E-mail: [jean.baum@rutgers.edu](mailto:jean.baum@rutgers.edu); Sagar Khare, Dept. of Chemistry and Chemical Biology Rutgers University, 610 Taylor Rd, Piscataway, NJ 08854. Telephone: (848) 445-5143; E-mail: [sagar.khare@rutgers.edu](mailto:sagar.khare@rutgers.edu)

**Keywords:** computer modeling, NMR, Parkinson's disease, protein aggregation, synuclein, beta-synuclein, fibril, neurodegeneration

---

**Author contributions:** GMM performed the NMR characterization, aggregation kinetics, experimental design, data analysis and manuscript preparation. MPO performed the computational modeling, chimera mutagenesis, and protein production. TBA performed AFM characterization, mutagenesis, and protein production. MKJ performed experimental design and assisted with chimera mutagenesis. SDK and JB were involved in experimental design, data analysis, and preparing the manuscript. All authors reviewed the results and approved the final version of the manuscript.

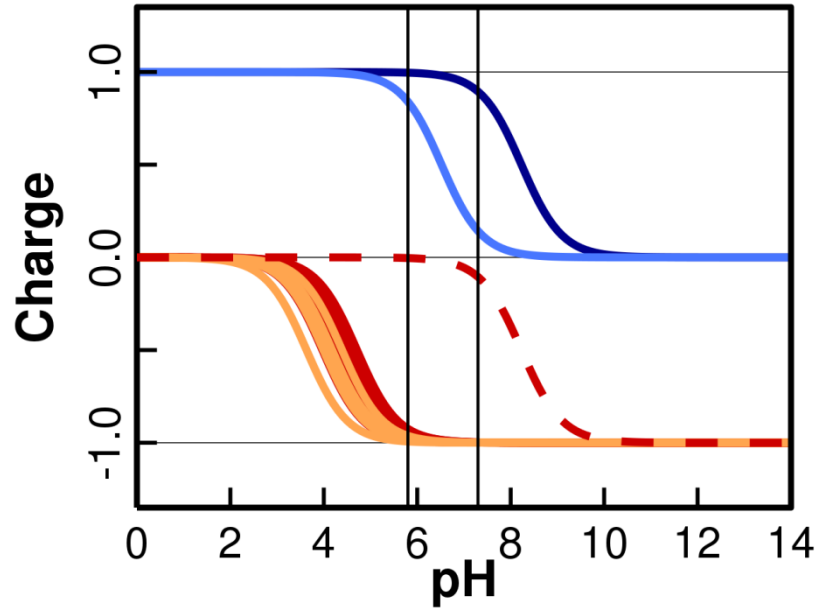

**Figure S1: An illustration of pH events in the experimental range for individual amino acids and  $\alpha$ S domains in the experimental pH range.** Change of charge per pH unit is calculated from the Henderson-Hasselbach equation for the indicated amino acid sidechains with the pKa values measured for those measured in Croke, 2011(1), except for the amino terminus which is assumed to be pKa 8. The free-amino terminus is indicated in dark blue, histidine in light blue, glutamic acid in dark red and aspartic acid in orange. The dark red dashed line indicates a  $-\text{COOH}$  group that titrates with a pKa of 8. Vertical lines indicate the experimental pH range 5.8-7.3.

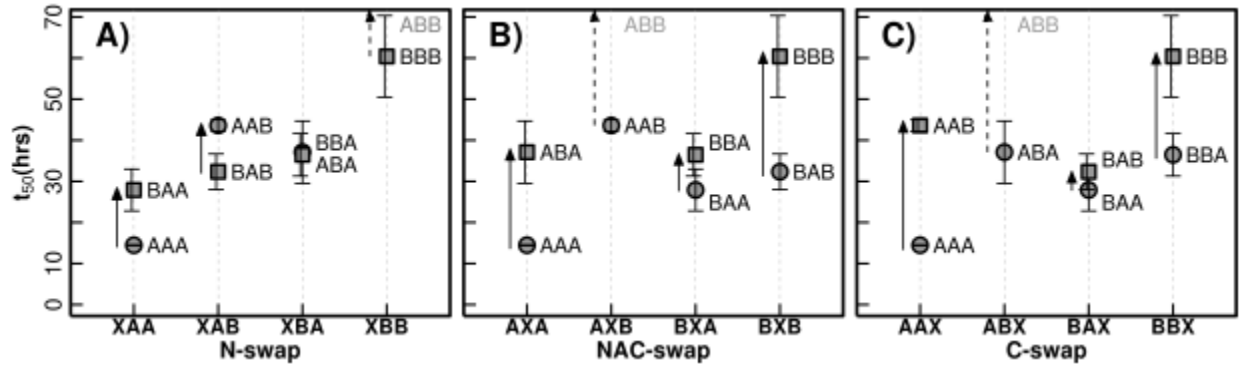

**Figure S2: A sequence comparison of the effect of individual  $\alpha$ S/ $\beta$ S domains on the  $t_{50}$  of fibrillation.** Each panel examines the effect of having A or B in the X position as indicated by the x-axis labels under mildly acidic pH 5.8. The four possible combinations of N-terminal swaps are examined in A), NAC swaps in B) and C domain swaps in C). Samples which contain B in the X position are shown in square symbols. ABB is represented off scale, as it is the only non-ThT fluorescent sample at this pH and may be considered to have an indeterminably long  $t_{50}$ .

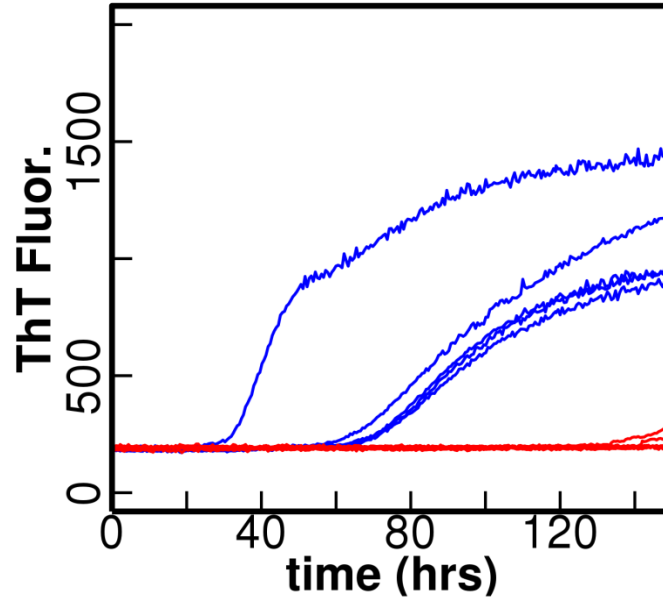

**Figure S3: ThT fluorescence of  $\beta$ S in alternate buffer at varying pH.**  $\beta$ S fibril formation, under the same conditions as described in Methods (600 rpm shaking, 37°C, ~1 mg/mL), also occurs in 20 mM sodium phosphate 100 mL salt as well as in the 20 mM MES 20 mM MOPS 100 mM NaCl buffer used in the main text. Low pH 5.8 is indicated in blue and high pH 7.3 in red. The raw fluorescence values are reported.

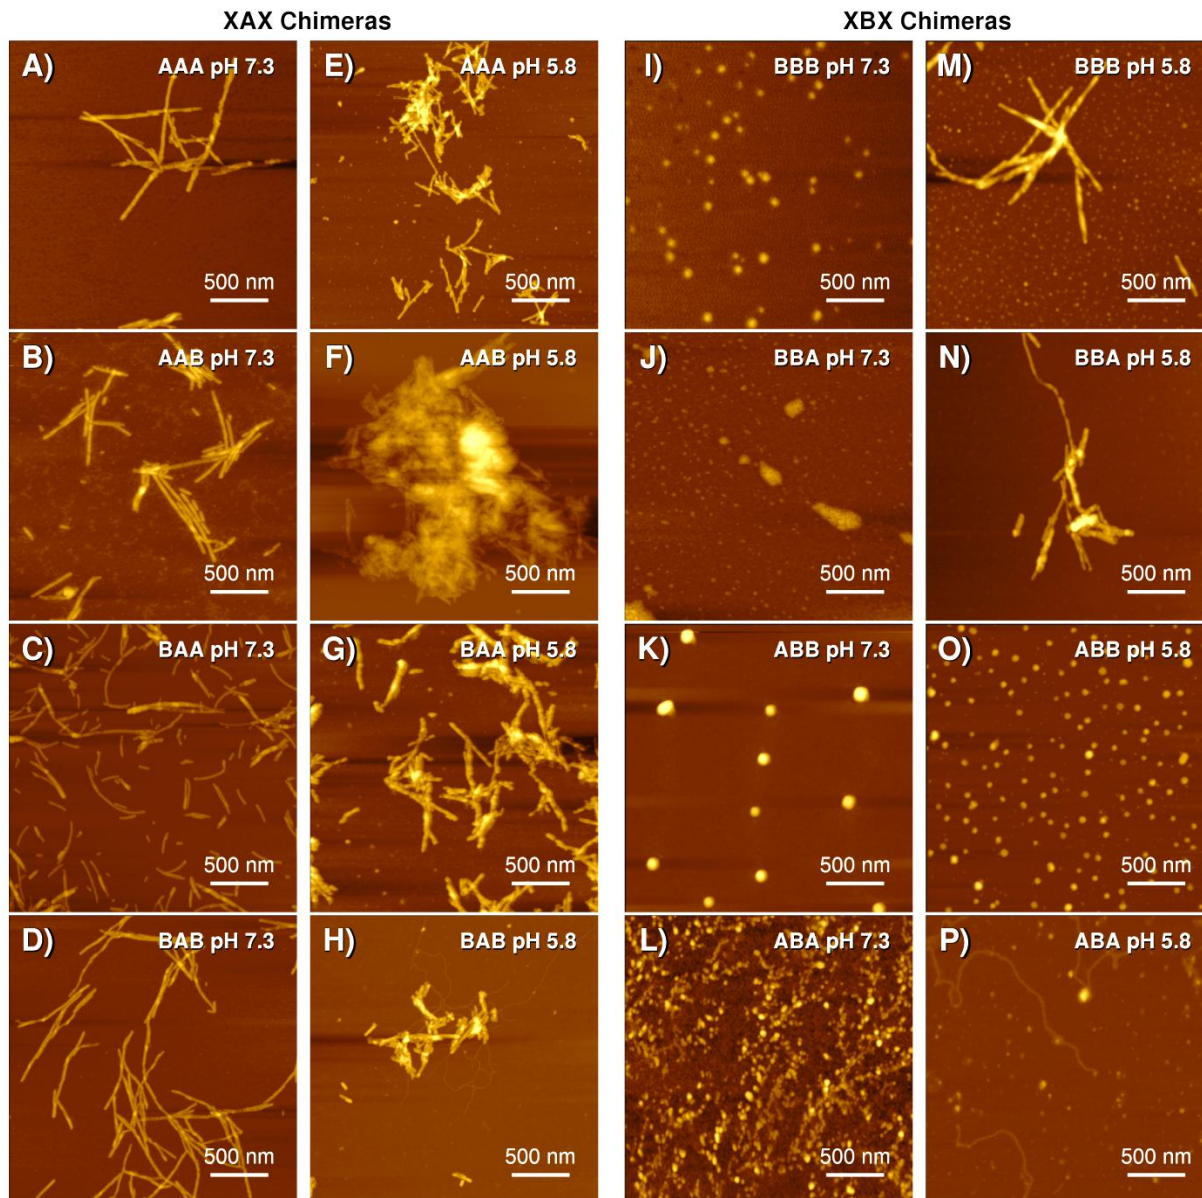

**Figure S4: pH dependent AFM imaging of  $\alpha$ S/ $\beta$ S chimeras.** All chimeras were imaged from a sample of the 1 mg/mL samples at the plateau phase of fibrillation. In each case a 2.5 X 2.5  $\mu$ m square was imaged, and the scale bar indicates a length of 500 nm. In A)-D) high pH 7.3 XAX chimeras are shown and in E) –H) low pH XAX chimeras are shown. Similarly in I)-L) and M)-P) are the low pH 5.8 and high pH 7.3 XBX chimeras, where X indicates either an A or B for an  $\alpha$ S domain or a  $\beta$ S domain respectively. Panels A, E, I, M, N, O, and P, are the same as Fig

2D,2C,2F,2E,5C,5B, and 5D, respectively, and are reproduced here to facilitate an overall comparison of all constructs at both pH values.

## Example Rosetta Scripts

```
#!/bin/bash

~/Rosetta/main/source/bin/rosetta_scripts.static.linuxgccrelease -s $1 -use_input_sc -
database ~/Rosetta/main/database -parser:protocol
thread_AEKTKEGVLYVGSKTREGVVQGVASVAEKTKEQASHLGGAVFSGAGNIA
AATGLVKREEFPTDLKPEE.xml -parser:script_vars symmfile=$2
resnums_to_restrict=$3 start_res=$4 threadseq=$5 -overwrite -run:preserve_header -ex1
-ex2 -extrachi_cutoff 1 -linmem_ig 10 -score:weights talaris2013_cst.wts -out:nstruct 40

<ROSETTASCRIPTS>
  <SCOREFXNS>
    <talaris_symm weights=talaris2013_cst.wts symmetric=1 />
  </SCOREFXNS>
  <RESIDUE_SELECTORS>
    <Index name=stable_res resnums=% %resnums_to_restrict% />
  </RESIDUE_SELECTORS>
  <TASKOPERATIONS>
    <InitializeFromCommandline name=init />
    <IncludeCurrent name=keep_curr />
    <OperateOnResidueSubset name=constraint_task selector=stable_res >
      <PreventRepackingRLT/>
    </OperateOnResidueSubset>
    <RestrictToRepacking name=restrict />
  </TASKOPERATIONS>
  <FILTERS>
    <PoseInfo name=poseinfo />
  </FILTERS>
  <MOVERS>
  Threading Movers
    <MutateResidue name=residue_30 target=30A new_res=ALA
preserve_atom_coords=True />
    <MutateResidue name=residue_31 target=31A new_res=GLU
preserve_atom_coords=True />
    <MutateResidue name=residue_32 target=32A new_res=LYS
preserve_atom_coords=True />
    <MutateResidue name=residue_33 target=33A new_res=THR
preserve_atom_coords=True />
    <MutateResidue name=residue_34 target=34A new_res=LYS
preserve_atom_coords=True />
    <MutateResidue name=residue_35 target=35A new_res=GLU
preserve_atom_coords=True />
    <MutateResidue name=residue_36 target=36A new_res=GLY
preserve_atom_coords=True />
```

<MutateResidue name=residue\_37 target=37A new\_res=VAL  
preserve\_atom\_coords=True />  
<MutateResidue name=residue\_38 target=38A new\_res=LEU  
preserve\_atom\_coords=True />  
<MutateResidue name=residue\_39 target=39A new\_res=TYR  
preserve\_atom\_coords=True />  
<MutateResidue name=residue\_40 target=40A new\_res=VAL  
preserve\_atom\_coords=True />  
<MutateResidue name=residue\_41 target=41A new\_res=GLY  
preserve\_atom\_coords=True />  
<MutateResidue name=residue\_42 target=42A new\_res=SER  
preserve\_atom\_coords=True />  
<MutateResidue name=residue\_43 target=43A new\_res=LYS  
preserve\_atom\_coords=True />  
<MutateResidue name=residue\_44 target=44A new\_res=THR  
preserve\_atom\_coords=True />  
<MutateResidue name=residue\_45 target=45A new\_res=ARG  
preserve\_atom\_coords=True />  
<MutateResidue name=residue\_46 target=46A new\_res=GLU  
preserve\_atom\_coords=True />  
<MutateResidue name=residue\_47 target=47A new\_res=GLY  
preserve\_atom\_coords=True />  
<MutateResidue name=residue\_48 target=48A new\_res=VAL  
preserve\_atom\_coords=True />  
<MutateResidue name=residue\_49 target=49A new\_res=VAL  
preserve\_atom\_coords=True />  
<MutateResidue name=residue\_50 target=50A new\_res=GLN  
preserve\_atom\_coords=True />  
<MutateResidue name=residue\_51 target=51A new\_res=GLY  
preserve\_atom\_coords=True />  
<MutateResidue name=residue\_52 target=52A new\_res=VAL  
preserve\_atom\_coords=True />  
<MutateResidue name=residue\_53 target=53A new\_res=ALA  
preserve\_atom\_coords=True />  
<MutateResidue name=residue\_54 target=54A new\_res=SER  
preserve\_atom\_coords=True />  
<MutateResidue name=residue\_55 target=55A new\_res=VAL  
preserve\_atom\_coords=True />  
<MutateResidue name=residue\_56 target=56A new\_res=ALA  
preserve\_atom\_coords=True />  
<MutateResidue name=residue\_57 target=57A new\_res=GLU  
preserve\_atom\_coords=True />  
<MutateResidue name=residue\_58 target=58A new\_res=LYS  
preserve\_atom\_coords=True />  
<MutateResidue name=residue\_59 target=59A new\_res=THR  
preserve\_atom\_coords=True />



<MutateResidue name=residue\_60 target=60A new\_res=LYS  
preserve\_atom\_coords=True />  
<MutateResidue name=residue\_61 target=61A new\_res=GLU  
preserve\_atom\_coords=True />  
<MutateResidue name=residue\_62 target=62A new\_res=GLN  
preserve\_atom\_coords=True />  
<MutateResidue name=residue\_63 target=63A new\_res=ALA  
preserve\_atom\_coords=True />  
<MutateResidue name=residue\_64 target=64A new\_res=SER  
preserve\_atom\_coords=True />  
<MutateResidue name=residue\_65 target=65A new\_res=HIS  
preserve\_atom\_coords=True />  
<MutateResidue name=residue\_66 target=66A new\_res=LEU  
preserve\_atom\_coords=True />  
<MutateResidue name=residue\_67 target=67A new\_res=GLY  
preserve\_atom\_coords=True />  
<MutateResidue name=residue\_68 target=68A new\_res=GLY  
preserve\_atom\_coords=True />  
<MutateResidue name=residue\_69 target=69A new\_res=ALA  
preserve\_atom\_coords=True />  
<MutateResidue name=residue\_70 target=70A new\_res=VAL  
preserve\_atom\_coords=True />  
<MutateResidue name=residue\_71 target=71A new\_res=PHE  
preserve\_atom\_coords=True />  
<MutateResidue name=residue\_72 target=72A new\_res=SER  
preserve\_atom\_coords=True />  
<MutateResidue name=residue\_73 target=73A new\_res=GLY  
preserve\_atom\_coords=True />  
<MutateResidue name=residue\_74 target=74A new\_res=ALA  
preserve\_atom\_coords=True />  
<MutateResidue name=residue\_75 target=75A new\_res=GLY  
preserve\_atom\_coords=True />  
<MutateResidue name=residue\_76 target=76A new\_res=ASN  
preserve\_atom\_coords=True />  
<MutateResidue name=residue\_77 target=77A new\_res=ILE  
preserve\_atom\_coords=True />  
<MutateResidue name=residue\_78 target=78A new\_res=ALA  
preserve\_atom\_coords=True />  
<MutateResidue name=residue\_79 target=79A new\_res=ALA  
preserve\_atom\_coords=True />  
<MutateResidue name=residue\_80 target=80A new\_res=ALA  
preserve\_atom\_coords=True />  
<MutateResidue name=residue\_81 target=81A new\_res=THR  
preserve\_atom\_coords=True />  
<MutateResidue name=residue\_82 target=82A new\_res=GLY  
preserve\_atom\_coords=True />

```

    <MutateResidue name=residue_83 target=83A new_res=LEU
preserve_atom_coords=True />
    <MutateResidue name=residue_84 target=84A new_res=VAL
preserve_atom_coords=True />
    <MutateResidue name=residue_85 target=85A new_res=LYS
preserve_atom_coords=True />
    <MutateResidue name=residue_86 target=86A new_res=ARG
preserve_atom_coords=True />
    <MutateResidue name=residue_87 target=87A new_res=GLU
preserve_atom_coords=True />
    <MutateResidue name=residue_88 target=88A new_res=GLU
preserve_atom_coords=True />
    <MutateResidue name=residue_89 target=89A new_res=PHE
preserve_atom_coords=True />
    <MutateResidue name=residue_90 target=90A new_res=PRO
preserve_atom_coords=True />
    <MutateResidue name=residue_91 target=91A new_res=THR
preserve_atom_coords=True />
    <MutateResidue name=residue_92 target=92A new_res=ASP
preserve_atom_coords=True />
    <MutateResidue name=residue_93 target=93A new_res=LEU
preserve_atom_coords=True />
    <MutateResidue name=residue_94 target=94A new_res=LYS
preserve_atom_coords=True />
    <MutateResidue name=residue_95 target=95A new_res=PRO
preserve_atom_coords=True />
    <MutateResidue name=residue_96 target=96A new_res=GLU
preserve_atom_coords=True />
    <MutateResidue name=residue_97 target=97A new_res=GLU
preserve_atom_coords=True />

    <SetupForSymmetry name=symm definition="%%symmfile%%" />
    <AddConstraintsToCurrentConformationMover name=cst_mover coord_dev=0.2
bb_only=1/>
    <FastRelax name=symmfastrelax scorefxn=talaris_symm
task_operations=init,keep_curr,restrict repeats=8 />
    OptimizeThreading name=threder start_position=%%start_res%%
thread_sequence=%%threadseq%% />

```

</MOVERS>

<PROTOCOLS>

Mover Adding

```
<Add mover=residue_30 />
```

```
<Add mover=residue_31 />
```

```
<Add mover=residue_32 />
```

<Add mover=residue\_33 />  
<Add mover=residue\_34 />  
<Add mover=residue\_35 />  
<Add mover=residue\_36 />  
<Add mover=residue\_37 />  
<Add mover=residue\_38 />  
<Add mover=residue\_39 />  
<Add mover=residue\_40 />  
<Add mover=residue\_41 />  
<Add mover=residue\_42 />  
<Add mover=residue\_43 />  
<Add mover=residue\_44 />  
<Add mover=residue\_45 />  
<Add mover=residue\_46 />  
<Add mover=residue\_47 />  
<Add mover=residue\_48 />  
<Add mover=residue\_49 />  
<Add mover=residue\_50 />  
<Add mover=residue\_51 />  
<Add mover=residue\_52 />  
<Add mover=residue\_53 />  
<Add mover=residue\_54 />  
<Add mover=residue\_55 />  
<Add mover=residue\_56 />  
<Add mover=residue\_57 />  
<Add mover=residue\_58 />  
<Add mover=residue\_59 />  
<Add mover=residue\_60 />  
<Add mover=residue\_61 />  
<Add mover=residue\_62 />  
<Add mover=residue\_63 />  
<Add mover=residue\_64 />  
<Add mover=residue\_65 />  
<Add mover=residue\_66 />  
<Add mover=residue\_67 />  
<Add mover=residue\_68 />  
<Add mover=residue\_69 />  
<Add mover=residue\_70 />  
<Add mover=residue\_71 />  
<Add mover=residue\_72 />  
<Add mover=residue\_73 />  
<Add mover=residue\_74 />  
<Add mover=residue\_75 />  
<Add mover=residue\_76 />  
<Add mover=residue\_77 />  
<Add mover=residue\_78 />

```
<Add mover=residue_79 />
<Add mover=residue_80 />
<Add mover=residue_81 />
<Add mover=residue_82 />
<Add mover=residue_83 />
<Add mover=residue_84 />
<Add mover=residue_85 />
<Add mover=residue_86 />
<Add mover=residue_87 />
<Add mover=residue_88 />
<Add mover=residue_89 />
<Add mover=residue_90 />
<Add mover=residue_91 />
<Add mover=residue_92 />
<Add mover=residue_93 />
<Add mover=residue_94 />
<Add mover=residue_95 />
<Add mover=residue_96 />
<Add mover=residue_97 />
```

```
Add mover_name=threader />
<Add mover_name=symm />
Add mover_name=cst_mover/>
<Add mover_name = symmfastrelax />
```

```
</PROTOCOLS>
</ROSETTASCRIPTS>
```

## References

1. Croke, R. L., Patil, S. M., Quevreaux, J., Kendall, D. A., and Alexandrescu, A. T. (2011) NMR determination of pKa values in alpha-synuclein. *Protein Sci* **20**, 256-269
